# Supplementary material for: Two eight-connected self-penetrating porous metal–organic frameworks: configurational isomers caused by different linking modes between terephthalate and binuclear nickel building units
Source: Royal Society of Chemistry journal article supplement (doi:10.1039/b812643g), 2008-11-05
Supplement: b812643g.pdf [file b812643g.pdf]

## Electronic Supplementary Information

### Two eight-connected self-penetrating porous metal-organic frameworks: configurational isomers caused by different linking modes between **terephthalate** and binuclear nickel building units

Guang-Sheng Yang, Ya-Qian Lan, Hong-Ying Zang, Kui-Zhan Shao,

Xin-Long Wang, Zhong-Min Su\* and Chun-Jie Jiang\*

Institute of Functional Material Chemistry; Department of Chemistry, Northeast  
Normal University, Changchun 130024, Jilin, People's Republic of China

\* Corresponding author.

E-mail: zmsu@nenu.edu.cn; jiangcj717nenu.edu.cn.

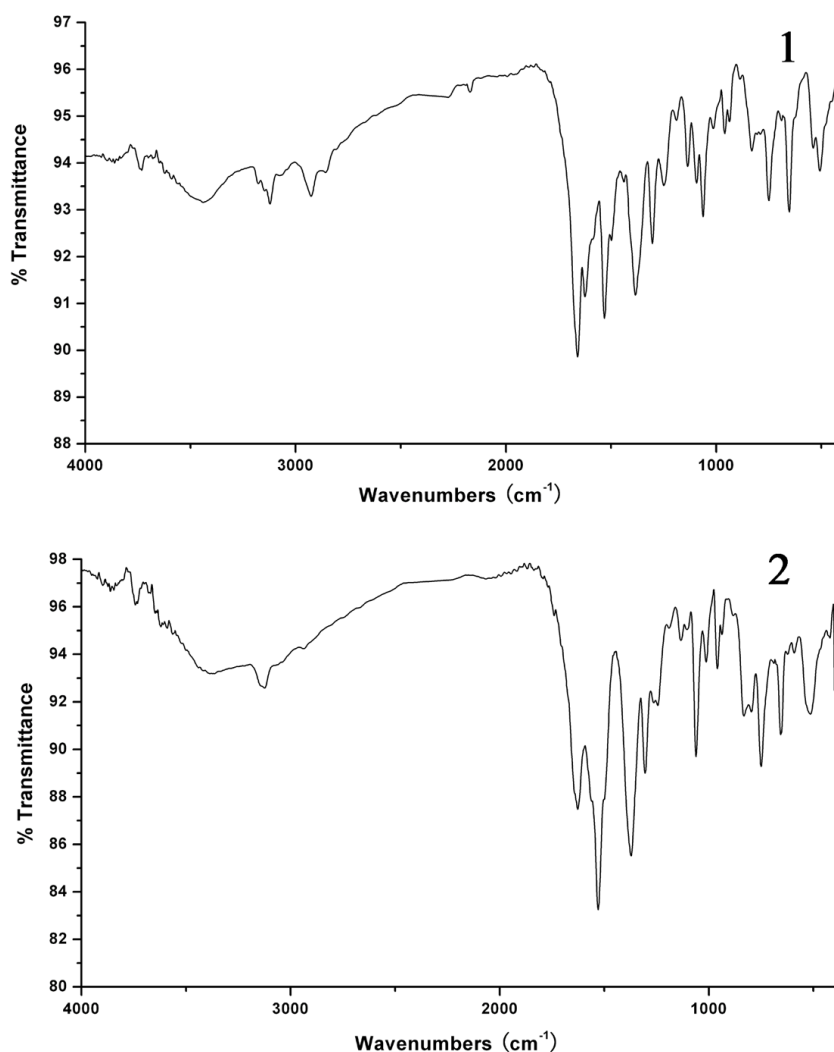

Fig. S1 FT-IR spectra of **1** and **2**.

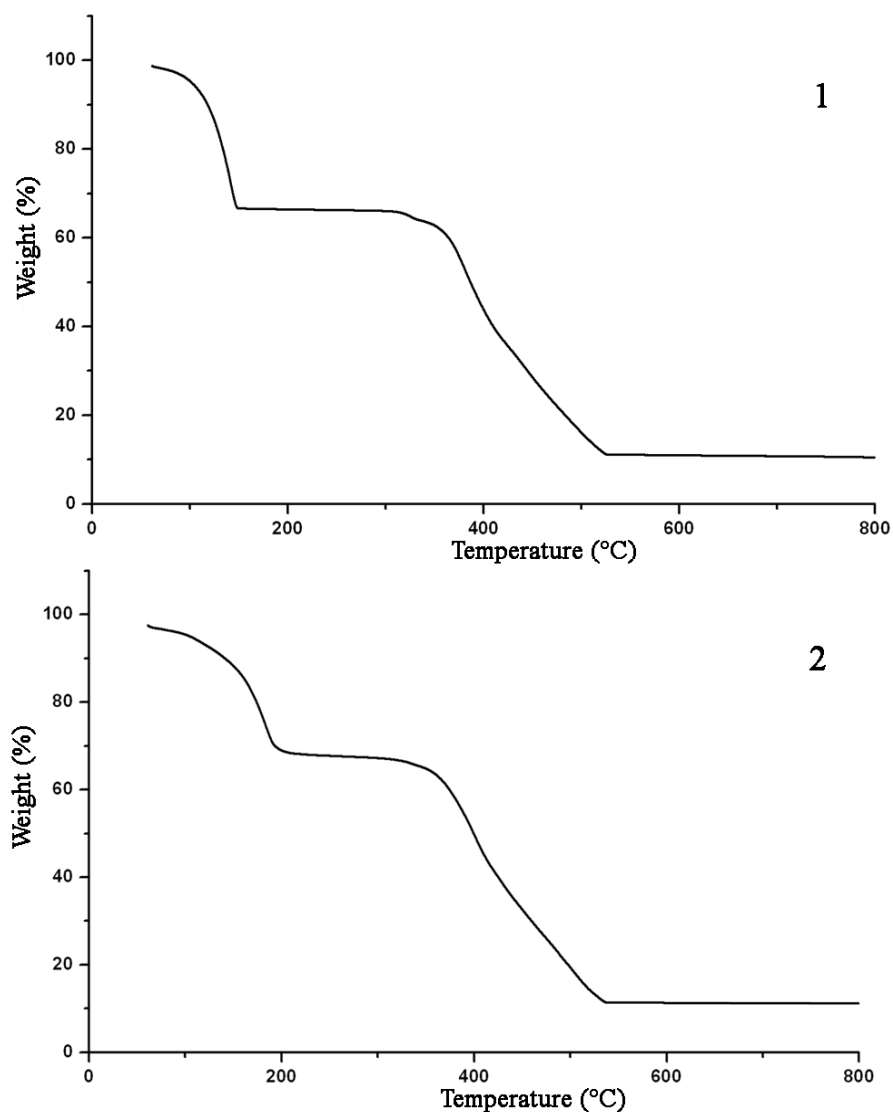

**Fig. S2** TGA curves of **1** and **2**.

**Table S1** Selected bond lengths (Å) and angles (°) for **1<sup>a</sup>** and **2<sup>b</sup>**

| Complex 1           |            |                     |            |                    |            |
|---------------------|------------|---------------------|------------|--------------------|------------|
| Ni(1)-O(2)#1        | 2.035(4)   | Ni(1)-O(1)#2        | 2.065(4)   | Ni(1)-N(1)#3       | 2.084(6)   |
| Ni(1)-N(4)          | 2.055(5)   | Ni(1)-O(4)          | 2.069(4)   | Ni(1)-O(1W)        | 2.100(3)   |
| O(2)#1-Ni(1)-N(4)   | 89.49(19)  | O(1)#2-Ni(1)-O(4)   | 88.04(18)  | O(2)#1-Ni(1)-O(1W) | 90.18(14)  |
| O(2)#1-Ni(1)-O(1)#2 | 97.35(18)  | O(2)#1-Ni(1)-N(1)#3 | 87.80(20)  | N(4)-Ni(1)-O(1W)   | 177.30(20) |
| N(4)-Ni(1)-O(1)#2   | 85.20(20)  | N(4)-Ni(1)-N(1)#3   | 92.80(20)  | O(1)#2-Ni(1)-O(1W) | 92.15(15)  |
| O(2)#1-Ni(1)-O(4)   | 174.26(18) | O(1)#2-Ni(1)-N(1)#3 | 174.50(20) | O(4)-Ni(1)-O(1W)   | 91.59(15)  |
| N(4)-Ni(1)-O(4)     | 88.99(19)  | O(4)-Ni(1)-N(1)#3   | 86.80(20)  | N(1)#3-Ni(1)-O(1W) | 89.90(20)  |
| Ni(1)#6-O(1W)-Ni(1) | 115.10(20) |                     |            |                    |            |
| Complex 2           |            |                     |            |                    |            |
| Ni(1)-O(1)          | 2.043(2)   | Ni(1)-O(3)          | 2.106(2)   | Ni(1)-N(3)         | 2.057(3)   |
| Ni(1)-O(2)#1        | 2.070(2)   | Ni(1)-O(1W)         | 2.093(2)   | Ni(1)-N(1)         | 2.058(3)   |

|                     |            |                   |           |                   |           |
|---------------------|------------|-------------------|-----------|-------------------|-----------|
| O(1)-Ni(1)-N(3)     | 173.61(10) | O(1)-Ni(1)-O(2)#1 | 96.60(8)  | O(1)-Ni(1)-O(1W)  | 92.62(7)  |
| O(1)-Ni(1)-N(1)     | 85.05(9)   | N(3)-Ni(1)-O(2)#1 | 88.87(10) | N(3)-Ni(1)-O(1W)  | 90.60(9)  |
| N(3)-Ni(1)-N(1)     | 91.63(10)  | N(1)-Ni(1)-O(2)#1 | 90.30(9)  | N(1)-Ni(1)-O(1W)  | 177.49(8) |
| O(2)#1-Ni(1)-O(1W)  | 90.90(6)   | N(3)-Ni(1)-O(3)   | 85.86(10) | O(2)#1-Ni(1)-O(3) | 174.60(8) |
| O(1)-Ni(1)-O(3)     | 88.60(8)   | N(1)-Ni(1)-O(3)   | 88.67(9)  | O(1W)-Ni(1)-O(3)  | 90.34(7)  |
| Ni(1)#1-O(1W)-Ni(1) | 113.72(12) |                   |           |                   |           |

<sup>a</sup> Symmetry transformations used to generate equivalent atoms: #1  $x+1/4, -y+9/4, z+1/4$ ; #2  $-x+1/4, y+1/4, z+1/4$ ; #3  $x+1/4, -y+7/4, z-1/4$ ; #6  $-x+1/2, -y+5/2, z$ .

<sup>b</sup> Symmetry transformations used to generate equivalent atoms: #1  $-x+1, y, -z+1/2$ .

---
